# Supplementary material
Source: PubMed Central journal article supplement (PMC58836)
Supplement: 1472-6963-1-10-S1.pdf [file 1472-6963-1-10-S1.pdf]

| Heading      | Subheading                     | Descriptor                                                                                                                                                                                                         | Where reported/comments                                                |
|--------------|--------------------------------|--------------------------------------------------------------------------------------------------------------------------------------------------------------------------------------------------------------------|------------------------------------------------------------------------|
| Title        |                                | Identify study as a randomised trial                                                                                                                                                                               | Title                                                                  |
| Abstract     |                                | Use a structured format                                                                                                                                                                                            | Page 2                                                                 |
| Introduction |                                | State prospectively defined hypothesis, clinical objectives, and planned subgroup or covariate analyses                                                                                                            | Page 6- outcomes and analysis                                          |
| Methods      | Protocol                       | P1: Planned study population, together with inclusion/exclusion criteria                                                                                                                                           | Page 5/6 & AI 1                                                        |
|              |                                | P2: Planned interventions and their timing                                                                                                                                                                         | Page 5/6                                                               |
|              |                                | P3: Primary and secondary outcome measure(s) and the minimum important differences, and how the sample size was projected                                                                                          | Page 6/7 & AI 2                                                        |
|              |                                | P4: Rationale and methods for statistical analyses, detailing main comparative analyses and whether they were completed in an intention to treat basis                                                             | Page 6/7 & AI 3                                                        |
|              |                                | P5: Prospectively designed stopping rules                                                                                                                                                                          | NA                                                                     |
|              | Assignment                     | A1: Unit of randomisation                                                                                                                                                                                          | Page 5                                                                 |
|              |                                | A2: Method used to generate the allocation schedule                                                                                                                                                                | AI 4                                                                   |
|              |                                | A3: Method of allocation concealment and timing of assignment                                                                                                                                                      | ?                                                                      |
|              |                                | A4: Method to separate the generator from the executor of assignment                                                                                                                                               | ?                                                                      |
|              | Blinding                       | Describe mechanism, similarity of treatment characteristics, allocation schedule control, and evidence for successful blinding among participants, person doing intervention, outcome assessors, and data analysts | AI 5                                                                   |
| Results      | Participant flow and follow-up | Provide a trial profile (figure) summarising participant flow, numbers and timing of randomisation assignment, interventions, and measurements for each randomised group                                           | Figure                                                                 |
|              | Analysis                       | R1: State estimated effect of interventions on primary and secondary outcome measures including point estimate and confidence interval                                                                             | Page 8 & Table 2 & 3 (1 <sup>o</sup> ) & Table 4 & 5 (2 <sup>o</sup> ) |
|              |                                | R2: State results in absolute numbers when feasible                                                                                                                                                                | Table 2 & 4                                                            |
|              |                                | R3: Present summary data and appropriate descriptive and inferential statistics in sufficient detail to permit alternative analyses and replication                                                                | Tables 1, 2 & 4                                                        |
|              |                                | R4: Describe prognostic variables by treatment group and any attempt to adjust for them                                                                                                                            | Results page 8 and Table 3                                             |
|              |                                | R5: Describe protocol deviations by treatment group and any attempt to adjust for them                                                                                                                             | NA                                                                     |
| Comment      |                                | C1: State specific interpretation of study findings, including sources of bias and imprecision (internal validity) and discussion of external validity, including appropriate quantitative measures when possible  | Page 9-10                                                              |
|              |                                | C2: State general interpretation of the data in light of the totality of the available evidence                                                                                                                    | Page 9-10                                                              |

AI = additional information sheets

NA = not applicable

## **Additional information**

### **1. Methods, Protocol, P1:**

All practices in Avon using the EMIS and AAH Meditel computing systems were invited to participate in the study. All patients aged 60-80 years with a diagnosis of hypertension and a record of having been prescribed anti-hypertensive medication in the previous year were eligible. Thirty eligible patients were randomly sampled from each practice list using either the computer system's built-in sampling facility (EMIS practices) or a random sampling programme on a personal computer (AAH Meditel practices). Non-ambulatory patients, those suffering from a life-threatening illness or those who had recently undergone major surgery were excluded.

### **2. Methods, Protocol, P3:**

The trial was designed to detect a difference between the two intervention arms of the main trial, CDSS plus chart guidelines versus chart guidelines alone. Based on previous work we estimated 55% of patients in this sample would have an absolute five-year cardiovascular risk of  $\geq 10\%$ . The sample size was designed to detect a difference between the main arms of the trial of 20% of patients at this risk level. A power of 80% and a two-tailed  $\alpha$  of 5%, along with an inflation factor of 2.05 since randomisation was by practice, resulted in a sample size of 190 in each of the intervention groups. The expectation was to recruit 20 practices with 20 patients in each.

### **3. Methods, Protocol, P4:**

Data management and analysis was done using Stata Statistical Software. Analyses were by intention to treat. Multivariable logistic regression was used to test all the outcome variables. Although follow-up data were collected at 6 and 12 months, results for only 12-month data are presented here. Adjusting for the clustering effect of using practice as the unit of randomisation did not affect the conclusions so the unadjusted analyses are reported.

### **4. Methods, Assignment, A2:**

The randomisation was performed using a table of random numbers by a researcher not involved in the study.

### **5. Methods, Blinding:**

Blinding the health professionals to intervention group was not possible given the nature of the study. No attempt was made to blind the data analysts (TP, AM & TF) to the study group.
